# Supplementary material for: LSCplus: a fast solution for improving long read accuracy by short read alignment
Source: PubMed Central journal article supplement (PMC5103424; doi:10.1186/s12859-016-1316-y), 2016-11-09
Supplement: 12859_2016_1316_MOESM1_ESM.pdf [file 12859_2016_1316_MOESM1_ESM.pdf]

## Pseudo code for Error Correction

```
N = ['A', 'A', 'A', 'C', 'A', 'G'];
// N is the candidate list of bases for a position
i = 0;
// selected from the first one
while (i < Length_of_N) {
    // choose the first candidate
    N_base = N[i];
    //Get the number of the N_base
    N_count = count (N, N_base);
    //Calculate the Frequency of the N_base in N
    Frequency = N_count / total number of all candidates contained in N list;
    //if the Frequency is greater than SCF, then the N_base will be selected and break the
loop
    If (Frequency*100 >= SCF) {
        selected_base_i = i;
        break;
    }
    //We note the most frequently appearing base in N; in the case in which no base
reaches the SCF value, the most frequent base will be used.
    If (N_count > max_count ){
        max_count = N_count;
        selected_base_i = i;
    }
    i = i+1; //next candidate
}
selected_base = N[selected_base_i];
ecLR.append(selected_base*HC_count)
```

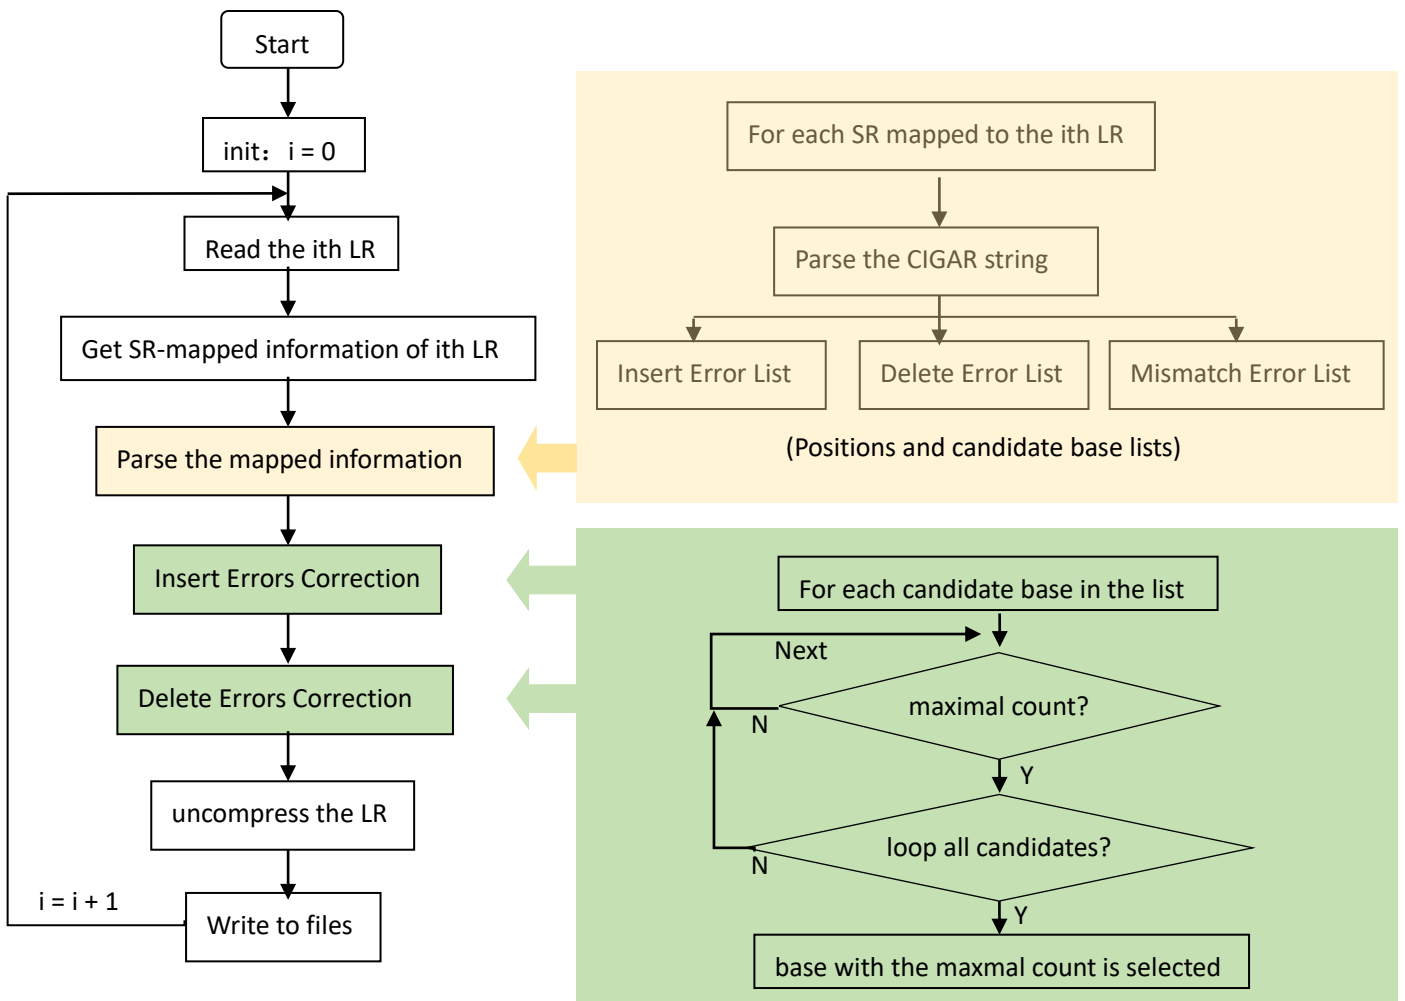

Supplementary Figure 1. Flowchart of Error Correction Step in LSC

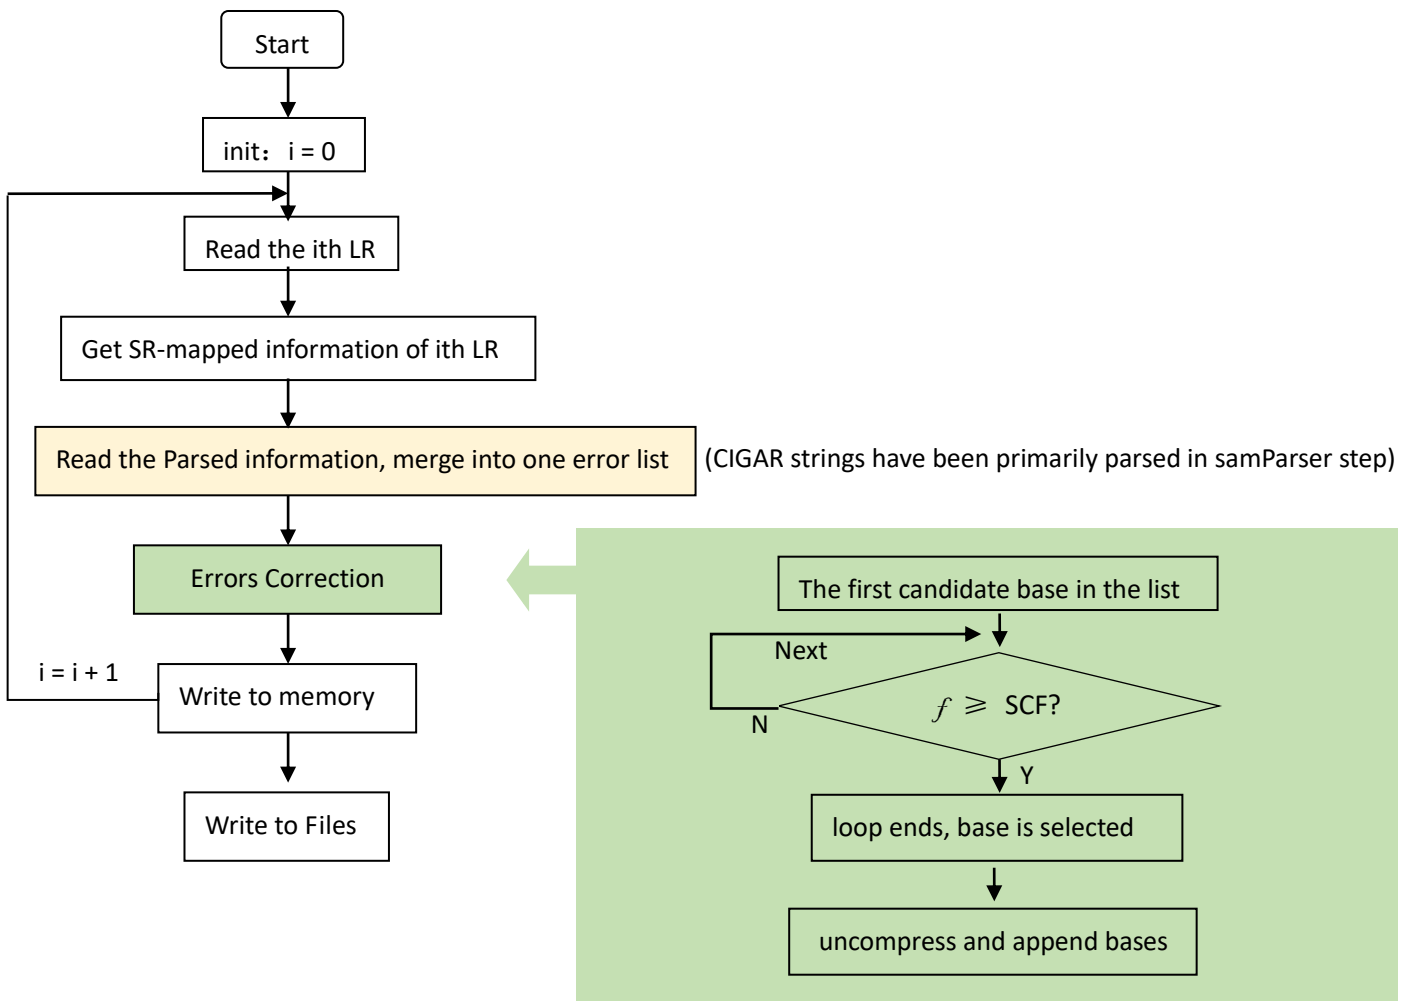

Supplementary Figure 2. Flowchart of Error Correction Step in LSCplus
