# Supplementary material for: LSCplus: a fast solution for improving long read accuracy by short read alignment
Source: PubMed Central journal article supplement (PMC5103424; doi:10.1186/s12859-016-1316-y), 2016-11-09
Supplement: 12859_2016_1316_MOESM2_ESM.pdf [file 12859_2016_1316_MOESM2_ESM.pdf]

From the SRA, we downloaded the pacbio e-coli dataset(ERR1274825) and the Illumina e-coli dataset(SRR3372215)

LSCplus is designed for RNA-seq analysis and only FASTA files are supported by the latest LSCplus.

We have developed a toolkit (LSCplus\_toolkit) for preparing SR.fa and LR.fa file, and can be downloaded from LSCplus website.

A detailed description of the steps is listed below (**Step 4 and Step 5 are optional, not necessary**):

Steps:

1. Fetch ERR1274825.sra;

command: fastq-dump ERR1274825

result: ERR1274825.sra was downloaded;

(fastq-dump is part of The NCBI SRA Toolkit. <http://www.ncbi.nlm.nih.gov/Traces/sra/>)

2. Convert ERR1274825.sra to ERR1274825.fastq;

command: fastq-dump ERR1274825

result: ERR1274825.fastq is got.

3. Convert ERR1274825.fastq to FASTA format with modified names (the pacbio reads names should be in the format "name/index/1\_(length)", where (length) is the length of the read.

command: python ConverToPacBio\_q2a.py ERR1274825.fastq

result: LR.fa is got.

(ConverToPacBio\_q2a.py is part of LSCplus\_toolkit)

*4\*. Align the pacbio reads to the e.coli reference(ecoli\_K12) using blasr with the parameters "-sam -bestn 1";*

*command: ./blasr LR.fa ecoli\_K12.fasta --sam --bestn 1 --out out.sam --header*

*result: out.sam is got*

*5\*. Selecte the aligned subsequences for the first 4000 reads;*

*command: python selectTopN.py out.sam 4000 LR.fa*

*result: The new LR.fa file is got.*

6. Fetch SRR3372215.sra;

command: fastq-dump SRR3372215

result: SRR3372215.sra was downloaded.

7. Convert SRR3372215.sra to SRR3372215\_1.fastq and SRR3372215\_2.fastq;

command: fastq-dump SRR3372215 --split-3

result: SRR3372215\_1.fastq and SRR3372215\_2.fastq are got;

8. Convert SRR3372215\_1.fastq and SRR3372215\_2.fastq to FASTA

command: python SR\_fastq2a.py SRR3372215\_1.fastq

python SR\_fastq2a.py SRR3372215\_2.fastq

result: SRR3372215\_1\_out.fasta and SRR3372215\_2\_out.fasta are got.

9. Concatenate the forward and reverse short reads files;

command: `python mergeSR.py SRR3372215_1_out.fasta SRR3372215_1_out.fasta`  
result: SR.fa is got.

10. Put the SR.fa and LR.fa into Data folder

11. Run LSCplus

command: `./LSCplus`

result: corrected\_LR.fa and corrected\_LR\_full.fa were got.

12. Analyze outputs

\*: Steps are optional, not necessary
